# Supplementary material
Source: PubMed Central journal article supplement (PMC4769118)
Supplement: NIHMS720421-supplement-01.pdf [file NIHMS720421-supplement-01.pdf]

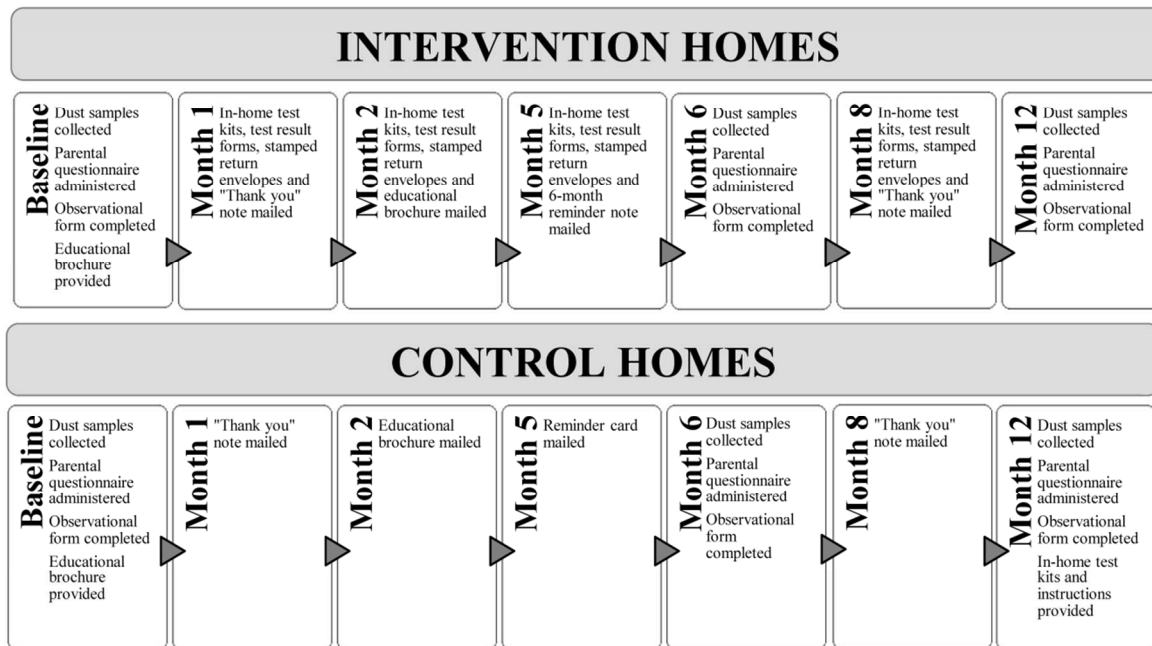

**Figure S1.** Detailed study procedures by patient group<sup>a</sup>.

a. Three of 4 intervention homes withdrew after baseline and one after the 6 month visit. The reasons given for withdrawal were "sick husband", "loss of interest in study", "moving out of area" and "staff unable to re-contact". The one control home withdrew after the 6 month visit and indicated "moving out of the area" as the reason for withdrawal.
